# Supplementary material
Source: publisher site journal article supplement (http://kjim.org/upload/media/kjim-2016-293-suppl4.pdf)
Supplement: Supplementary file 1 [file kjim-2016-293-suppl4.pdf]

**Supplementary Table 4. Univariate analysis for OS and PFS according to the change patterns of inflammatory markers**

| Variable            | OS   |           |         | PFS  |            |         |
|---------------------|------|-----------|---------|------|------------|---------|
|                     | HR   | 95% CI    | p value | HR   | 95% CI     | p value |
| NLR change pattern  |      |           | < 0.001 |      |            | < 0.001 |
| Low to low          | 1.00 |           |         | 1.00 |            |         |
| High to low         | 1.26 | 1.00–1.57 | 0.046   | 1.27 | 1.02–1.60  | 0.035   |
| Low to high         | 1.79 | 1.35–2.38 | < 0.001 | 2.14 | 1.61–2.85  | < 0.001 |
| High to high        | 3.03 | 2.19–4.21 | < 0.001 | 3.87 | 2.77–5.40  | < 0.001 |
| mGPS change pattern |      |           | < 0.001 |      |            | < 0.001 |
| Low to low          | 1.00 |           |         | 1.00 |            |         |
| High to low         | 1.05 | 0.79–1.39 | 0.731   | 1.04 | 0.78–1.38  | 0.792   |
| Low to high         | 1.46 | 1.10–1.96 | 0.010   | 1.61 | 1.20–2.15  | 0.001   |
| High to high        | 4.14 | 2.52–6.80 | < 0.001 | 6.94 | 4.18–11.52 | < 0.001 |

OS, overall survival; PFS, progression-free survival; HR, hazard ratio; CI, confidence interval; NLR, neutrophil-to-lymphocyte ratio; mGPS, modified Glasgow prognostic score.
